# Supplementary material for: Association of Multimorbidity and Excess Mortality After Fractures Among Danish Adults
Source: PubMed Central journal article supplement (PMC9552889; doi:10.1001/jamanetworkopen.2022.35856), 2022-10-10

## Supplementary Online Content

Tran T, Bliuc D, Ho-Le T, et al. Association of multimorbidity and excess mortality after fractures among Danish adults. *JAMA Netw Open*. 2022;5(10):e2235856.  
doi:10.1001/jamanetworkopen.2022.35856

**eMethods.** Latent Class Analysis and Relative Survival Analysis

**eReferences**

**eTable 1.** List of *ICD-10* Codes Used to Define Specific Fractures and Comorbidities of Interest

**eTable 2.** Number of Comorbidities and Deaths by Specific Fracture Sites

**eTable 3.** The Parameters of Latent Class Models

**eTable 4.** Probabilistic Distribution of All Comorbidities of Interest Within Each Multimorbidity Cluster

**eFigure 1.** Flowchart of Follow-up

**eFigure 2.** The Model's Fit Indices of the Latent Class Models

This supplementary material has been provided by the authors to give readers additional information about their work.

## **eMethods.** Latent Class Analysis and Relative Survival Analysis

### *Latent class analysis*

A latent class analysis (LCA)<sup>1</sup> is a cluster analysis that groups binary objects so that objects in the same group are more similar to each other than those in other groups using their estimated probabilities of belonging to a specific group. This statistical clustering technique utilises maximum likelihood estimation to assimilate the observed specific comorbidities into unobserved classes that are statistically distinct and clinically meaningful<sup>2</sup>. Importantly, LCA allows the comparison between all possible combinations of the variables of interest, which were the specific health conditions in our analysis to be statistically tested, making the selection of optimal clusters rigorous, objective and reproducible.<sup>2</sup>

Latent class analysis has been shown to be superior to the counts-based methods of measuring multimorbidity, which are usually not possible to distinguish between individuals with the same number but different types of diseases<sup>3</sup>. LCA is also more robust than the conventional clustering techniques<sup>2,4</sup> as not only does LCA provide rigorous statistical tests to assess model fit, class separation, but also formal criteria to make decisions to select the optimal clusters. LCA has been found to be also associated with significantly lower rate of misclassification than the k-means method, one of the most commonly used clustering methods (1.3% vs. 8%,  $P < 0.01$ )<sup>5</sup>. However, as LCA assigns the participants to cluster based on their probability of being in the clusters<sup>1,2</sup>, a risk of misclassification bias in LCA, though lower than the conventional clustering techniques cannot be completely eliminated. Additionally, the name of the identified clusters, usually assigned by researchers for convenience in interpretation sometimes leads to a “naming fallacy”<sup>6</sup> wherein the cluster name might not accurately or fully reflect the cluster nature due to complexity of the cluster.

We conducted LCA<sup>1</sup> to determine the unique clusters of comorbidities presented at the time of fracture. Technically, we first developed a series of models in which we varied the number of latent classes from 2 to 10. We optimized the number of latent classes to provide the best fit for the data and the best separation among classes. Latent class enumeration was conducted without covariates to prevent problems related to class overestimation<sup>7</sup>. The optimal number of classes was chosen based on three criteria: (i) data fit, (ii) separation capacity and (iii) smallest meaningful class. We used the statistical model fit indices including log likelihood plot where the log likelihood starts to level off and other criteria, such as adjusted Bayesian Information Criterion (BIC) and Akaike Information Criterion

(AIC) in which the smaller value indicates better fit<sup>8</sup>. An entropy statistic was used to quantify the degree of separation between latent classes, with the level of  $\geq 0.6$  suggesting good between-group separation<sup>9</sup>, whereas the smallest meaningful estimated class proportion was expected to be at least 5%<sup>8</sup>. Once the optimal latent class model was selected, each participant was assigned to the “best-fit” cluster for which he or she had the highest computed probability of membership.

### ***Relative survival analysis***

Relative survival analysis was originally developed to determine excess mortality attributable to a specific cancer by comparing the observed all-cause mortality rate in the cancer cohort with the expected mortality rate in a comparative age-, sex- and calendar period-matched general population. All-cause deaths in the cancer cohort result from two sources: the cancer *per se* and other causes; whereas the expected background time-related mortality rate in the comparative general cohort is assumed to reflect the contribution of “other causes” to mortality over time. As a result, the excess mortality is then considered a robust measure of mortality attributable to the cancer or a disease of interest<sup>10</sup>. Cause-specific mortality data are not needed in a relative survival analysis, making it especially relevant for examining the contribution of fracture to mortality as a fracture is rarely recognized as a contributing cause of death<sup>11 12</sup>.

We performed relative survival analysis to quantify excess mortality attributable to the interaction between specific multimorbidity clusters and individual fracture sites under similar assumptions originally used in oncology research<sup>10</sup>. Excess mortality for patients in a specific multimorbidity cluster who fractured at a specific site, calculated as 1 minus its relative survival ratio can be interpreted as the proportion of patients who would die due to the combination between the specific comorbidity cluster and the individual fracture site. The relative survival ratio is the ratio of observed survival among the cohort of individuals in a specific multimorbidity cluster who fractured at a specific site to the expected survival in a comparative age-, sex- and calendar period-matched general population<sup>10</sup>. The observed survival was calculated using all-cause deaths of the fracture cohort; whereas the expected survival is the survival probability of similar individuals from the general population of the same age, sex and calendar period as the fracture cohort<sup>10</sup>. We used the Ederer II method<sup>13</sup> to estimate the expected mortality rate from the Danish population life tables stratified by sex, age and calendar period from the Human Mortality Database<sup>14</sup>. An excess mortality of zero

indicates that the mortality rate observed in the cohort of patients with specific fracture in a specific cluster of comorbidities is not different from that in a comparative background population and hence that no excess mortality is attributable to the combination of the cluster of comorbidity and the fracture site.

## eReferences

1. Linzer DAL, J. B. poLCA: An R Package for Polytomous Variable Latent Class Analysis. *J Stat Soft* 2011;42(10)
2. Hagenaars JAM, A. L. Applied latent class analysis: Cambridge University Press 2002.
3. Harrison C, Britt H, Miller G, et al. Examining different measures of multimorbidity, using a large prospective cross-sectional study in Australian general practice. *BMJ open* 2014;4(7):e004694.
4. Busija L, Lim K, Szoeki C, et al. Do replicable profiles of multimorbidity exist? Systematic review and synthesis. *Eur J Epidemiol* 2019;34(11):1025-53.
5. Magidson J, Vermunt J. Latent class models for clustering: a comparison with K-means. *Can J Mark Res* 2002;20:37-44.
6. Weller BE, Bowen NL, Faubert, SL. Latent Class Analysis: A Guide to Best Practice. *J Black Psychol* 2020;46(4):287-311.
7. Vermunt JK. Latent class modeling with covariates: two improved three-step approaches. *Polit Anal* 2010;18(4):450-69.
8. Nylund KLA, T.; Muthen, B.O. Deciding on the number of classes in latent class analysis and growth mixture modeling: a Monte Carlo simulation study. *Struct Equ Modelling* 2007;14:535-69.
9. Asparouhov TM, B. Auxiliary variables in mixture modeling: Three-step approaches using Mplus. *Struct Equ Modelling* 2014;21(3):329-41.
10. Dickman PW, Sloggett A, Hills M, et al. Regression models for relative survival. *Stat Med* 2004;23(1):51-64.
11. Calder SJ, Anderson GH, Gregg PJ. Certification of cause of death in patients dying soon after proximal femoral fracture. *BMJ* 1996;312(7045):1515.
12. Hindmarsh DM, Hayen A, Finch CF, et al. Relative survival after hospitalisation for hip fracture in older people in New South Wales, Australia. *Osteoporos Int* 2009;20(2):221-9.
13. Ederer F, Axtell LM, Cutler SJ. The relative survival rate: a statistical methodology. *J Natl Cancer Inst Monogr* 1961;6:101-21.
14. Human Mortality Database. University of California, Berkeley (USA), and Max Planck Institute for Demographic Research (Germany). Available at: [www.mortality.org](http://www.mortality.org).

**eTable 1.** List of *ICD-10* Codes Used to Define Specific Fractures and Comorbidities of Interest

| <b>Conditions</b>                     | <b>ICD-10 codes</b>                                                                                                                                                           |
|---------------------------------------|-------------------------------------------------------------------------------------------------------------------------------------------------------------------------------|
| <b>Fractures:</b>                     |                                                                                                                                                                               |
| <i>Proximal fractures:</i>            |                                                                                                                                                                               |
| Hip                                   | S72.0- S72.2                                                                                                                                                                  |
| Femur                                 | S72.3-S72.9                                                                                                                                                                   |
| Pelvis                                | S32.3-S32.5                                                                                                                                                                   |
| Vertebrae                             | S22.0, S22.1, S32.0, S32.2, S32.7, S32.8, T08.x                                                                                                                               |
| Humerus                               | S42.x                                                                                                                                                                         |
| Rib                                   | S22.3-S22.4                                                                                                                                                                   |
| Clavicle                              | S42.0                                                                                                                                                                         |
| <i>Distal fractures:</i>              |                                                                                                                                                                               |
| Forearm                               | S52.x                                                                                                                                                                         |
| Lower leg                             | S82.2-S82.8                                                                                                                                                                   |
| Knee                                  | S82.0                                                                                                                                                                         |
| Ankle                                 | S82.5-S82.6                                                                                                                                                                   |
| Foot                                  | S92.0-S92.3, S92.7, S92.9                                                                                                                                                     |
| Hand                                  | S62.0-S62.4, S62.8                                                                                                                                                            |
| <b>Comorbidities:</b>                 |                                                                                                                                                                               |
| Myocardial infarct                    | I21.x, I22.x, I25.2                                                                                                                                                           |
| Congestive heart failure              | I09.9, I11.0, I13.0, I13.2, I25.5, I42.0, I42.5 - I42.9, I43.x, I50.x, P29.0                                                                                                  |
| Peripheral vascular disease           | I70.x, I71.x, I73.1, I73.8, I73.9, I77.1, I79.0, I79.2, K55.1, K55.8, K55.9, Z95.8, Z95.9                                                                                     |
| Cerebrovascular disease               | G45.x, G46.x, H34.0, I60.x - I69.x                                                                                                                                            |
| Cardiac valvular disease              | A52.0, I05.x - I08.x, I09.1, I09.8, I34.x - I39.x, Q23.0 - Q23.3, Z95.2 - Z95.4                                                                                               |
| Cardiac arrhythmias                   | I44.1 - I44.3, I45.6, I45.9, I47.x - I49.x, R00.0, R00.1, R00.8, T82.1, Z45.0, Z95.0                                                                                          |
| Diabetes without chronic complication | E10.0, E10.1, E10.6, E10.8, E10.9, E11.0, E11.1, E11.6, E11.8, E11.9, E12.0, E12.1, E12.6, E12.8, E12.9, E13.0, E13.1, E13.6, E13.8, E13.9, E14.0, E14.1, E14.6, E14.8, E14.9 |

| <b>Conditions</b>                                                                   | <b>ICD-10 codes</b>                                                                                                                                  |
|-------------------------------------------------------------------------------------|------------------------------------------------------------------------------------------------------------------------------------------------------|
| Diabetes with chronic complication                                                  | E10.2 - E10.5, E10.7, E11.2 - E11.5, E11.7, E12.2 - E12.5, E12.7, E13.2 - E13.5, E13.7, E14.2 - E14.5, E14.7                                         |
| Any malignancy, including lymphoma and leukaemia, except malignant neoplasm of skin | C00.x - C26.x, C30.x - C34.x, C37.x - C41.x, C43.x, C45.x - C58.x, C60.x - C76.x, C81.x - C85.x, C88.x, C90.x - C97.x                                |
| Metastatic solid tumour                                                             | C77.x - C80.x                                                                                                                                        |
| Rheumatic/Rheumatoid arthritis or collagen vascular disease                         | L94.0, L94.1, L94.3, M05.x, M06.x, M31.5, M32.x - M34.x, M08.x, M12.0, M12.3, M30.x, M31.0 - M31.3, M32.x - M35.x, M36.0, M45.x, M46.1, M46.8, M46.9 |
| Mild liver disease                                                                  | B18.x, K70.0 - K70.3, K70.9, K71.3 - K71.5, K71.7, K73.x, K74.x, K76.0, K76.2 - K76.4, K76.8, K76.9, Z94.4                                           |
| Moderate or severe liver disease                                                    | I85.0, I85.9, I86.4, I98.2, K70.4, K71.1, K72.1, K72.9, K76.5, K76.6, K76.7                                                                          |
| Hypertension                                                                        | I10.x, I11.x - I13.x, I15.x                                                                                                                          |
| Chronic pulmonary disease                                                           | I27.8, I27.9, J40.x - J47.x, J60.x - J67.x, J68.4, J70.1, J70.3                                                                                      |
| Pulmonary circulation disorders                                                     | I26.x, I27.x, I28.0, I28.8, I28.9                                                                                                                    |
| Dementia                                                                            | F00.x - F03.x, F05.1, G30.x, G31.1                                                                                                                   |
| Psychoses                                                                           | F20.x, F22.x - F25.x, F28.x, F29.x, F30.2, F31.2, F31.5                                                                                              |
| Depression                                                                          | F20.4, F31.3 - F31.5, F32.x, F33.x, F34.1, F41.2, F43.2                                                                                              |
| Neurological disorders                                                              | G10.x - G13.x, G20.x - G22.x, G25.4, G25.5, G31.2, G31.8, G31.9, G32.x, G35.x - G37.x, G40.x, G41.x, G93.1, G93.4, R47.0, R56.x                      |
| Hemiplegia or paraplegia                                                            | G04.1, G11.4, G80.1, G80.2, G81.x, G82.x, G83.0 - G83.4, G83.9                                                                                       |
| Peptic ulcer disease                                                                | K25.x - K28.x                                                                                                                                        |
| Chronic kidney disease                                                              | I12.0, I13.1, N03.2 - N03.7, N05.2 - N05.7, N18.x, N19.x, N25.0, Z49.0 - Z49.2, Z94.0, Z99.2                                                         |
| Hypothyroidism                                                                      | E00.x - E03.x, E89.0                                                                                                                                 |
| Coagulopathy                                                                        | D65 - D68.x, D69.1, D69.3 - D69.6                                                                                                                    |
| Obesity                                                                             | E66.x                                                                                                                                                |
| Unintended weight loss                                                              | E40.x - E46.x, R63.4, R64                                                                                                                            |
| Fluid and electrolyte disorders                                                     | E22.2, E86.x, E87.x                                                                                                                                  |
| Anaemia                                                                             | D50.0, D50.8, D50.9, D51.x - D53.x                                                                                                                   |

| <b>Conditions</b> | <b>ICD-10 codes</b>                                                            |
|-------------------|--------------------------------------------------------------------------------|
| Alcohol abuse     | F10, E52, G62.1, I42.6, K29.2, K70.0, K70.3, K70.9, T51.x, Z50.2, Z71.4, Z72.1 |
| Drug abuse        | F11.x - F16.x, F18.x, F19.x, Z71.5, Z72.2                                      |
| AIDS/HIV          | B20.x - B22.x, B24.x                                                           |

**eTable 2.** Number of Comorbidities and Deaths by Specific Fracture Sites

|           | Men                 |                                    |                                        |                  |                               |                                                  | Women               |                                    |                                        |                  |                               |                                                  |
|-----------|---------------------|------------------------------------|----------------------------------------|------------------|-------------------------------|--------------------------------------------------|---------------------|------------------------------------|----------------------------------------|------------------|-------------------------------|--------------------------------------------------|
|           | Number of fractures | Age at fracture (years): Mean (SD) | Number of co-morbidities: Median (IQR) | Number of deaths | Follow-up time (person-years) | Incidence of death per 100 person-years (95% CI) | Number of fractures | Age at fracture (years): Mean (SD) | Number of co-morbidities: Median (IQR) | Number of deaths | Follow-up time (person-years) | Incidence of death per 100 person-years (95% CI) |
| Hip       | 25693               | 79.5 (9.7)                         | 2 (1, 4)                               | 16873            | 107767                        | 15.0 (14.8, 15.2)                                | 51666               | 82.1 (9.2)                         | 2 (1, 3)                               | 31806            | 259059                        | 11.4 (11.3, 11.5)                                |
| Femur     | 1920                | 74.5 (10.8)                        | 2 (1, 4)                               | 1006             | 10467                         | 9.6 (9.0, 10.2)                                  | 3530                | 78.9 (10.9)                        | 1 (0, 3)                               | 1924             | 19320                         | 9.9 (9.5, 10.3)                                  |
| Pelvis    | 1303                | 77.1 (10.9)                        | 2 (1, 4)                               | 752              | 6463                          | 11.6 (10.8, 12.5)                                | 4924                | 81.2 (10.0)                        | 2 (1, 3)                               | 2894             | 26759.5                       | 10.7 (10.3, 11.1)                                |
| Vertebra  | 6932                | 72.7 (10.5)                        | 2 (1, 3)                               | 3136             | 41737                         | 7.5 (7.2, 7.7)                                   | 9753                | 76.6 (10.6)                        | 2 (0, 3)                               | 4669             | 60291                         | 7.7 (7.4, 7.9)                                   |
| Rib       | 6879                | 69.7 (10.4)                        | 1 (0, 3)                               | 2368             | 50177                         | 4.7 (4.5, 4.9)                                   | 3163                | 74.0 (11.9)                        | 1 (0, 3)                               | 1221             | 22284                         | 5.5 (5.2, 5.8)                                   |
| Clavicle  | 5197                | 68.1 (10.5)                        | 1 (0, 2)                               | 1629             | 39723                         | 4.1 (3.9, 4.3)                                   | 4464                | 72.7 (11.5)                        | 1 (0, 2)                               | 1584             | 31754                         | 5.0 (4.7, 5.2)                                   |
| Humerus   | 10117               | 72.6 (10.7)                        | 2 (1, 3)                               | 4822             | 62339                         | 7.7 (7.4, 7.9)                                   | 28298               | 74.4 (10.5)                        | 1 (0, 2)                               | 10327            | 202649                        | 5.0 (4.9, 5.1)                                   |
| Forearm   | 15255               | 69.4 (10.2)                        | 1 (0, 2)                               | 4663             | 120702                        | 3.8 (3.7, 3.9)                                   | 68310               | 72.0 (10.3)                        | 1 (0, 2)                               | 18457            | 559370                        | 3.1 (3.1, 3.2)                                   |
| Knee      | 1387                | 70.2 (10.1)                        | 1 (0, 3)                               | 448              | 10886                         | 4.1 (3.7, 4.5)                                   | 2609                | 71.3 (9.7)                         | 1 (0, 2)                               | 629              | 21084.5                       | 3.0 (2.8, 3.2)                                   |
| Lower leg | 6302                | 67.0 (9.5)                         | 1 (0, 3)                               | 1803             | 52909                         | 3.4 (3.2, 3.6)                                   | 11468               | 70.1 (10.8)                        | 1 (0, 2)                               | 3139             | 94303                         | 3.3 (3.2, 3.4)                                   |
| Ankle     | 1081                | 67.6 (9.8)                         | 1 (0, 2)                               | 272              | 9080                          | 3.0 (2.6, 3.7)                                   | 1936                | 70.0 (10.6)                        | 1 (0, 2)                               | 496              | 15726                         | 3.2 (2.0, 3.4)                                   |
| Hand      | 8309                | 67.7 (10.1)                        | 1 (0, 2)                               | 2176             | 70258                         | 3.1 (3.0, 3.2)                                   | 12471               | 69.6 (10.2)                        | 1 (0, 2)                               | 2681             | 108102.5                      | 2.5 (2.4, 2.6)                                   |
| Foot      | 4997                | 65.3 (8.7)                         | 1 (0, 2)                               | 1069             | 44132.5                       | 2.4 (2.3, 2.6)                                   | 9907                | 67.8 (9.6)                         | 1 (0, 2)                               | 1900             | 86131                         | 2.2 (2.1, 2.3)                                   |



**eTable 3.** The Parameters of Latent Class Models

|                         | 2-class  | 3-class  | 4-class  | 5-class  | 6-class  | 7-class  | 8-class  | 9-class  | 10-class |
|-------------------------|----------|----------|----------|----------|----------|----------|----------|----------|----------|
| <b>Men (n=95372)</b>    |          |          |          |          |          |          |          |          |          |
| Number of parameters    | 65       | 98       | 131      | 164      | 197      | 230      | 263      | 296      | 329      |
| Degree of freedom       | 95307    | 95274    | 95241    | 95208    | 95175    | 95142    | 95109    | 95076    | 95043    |
| Maximal Log Likelihood  | -595242  | -588659  | -583536  | -578908  | -576199  | -575045  | -574213  | -573668  | -573318  |
| AIC                     | 1190613  | 1177514  | 1167333  | 1158144  | 1152792  | 1150551  | 1148952  | 1147927  | 1147294  |
| BIC                     | 1191228  | 1178442  | 1168573  | 1159696  | 1154657  | 1152728  | 1151442  | 1150729  | 1150408  |
| Adjusted BIC            | 1190514  | 1177365  | 1167134  | 1157894  | 1152493  | 1150201  | 1148552  | 1147477  | 1146793  |
| Likelihood ratio        | 117347.5 | 104182.9 | 93936    | 84680.4  | 79263    | 76955.4  | 75290.6  | 74199.9  | 73500.8  |
| Smallest class          | 31.3%    | 5.9%     | 2.0%     | 5.1%     | 2.0%     | 2.0%     | 2.0%     | 2.1%     | 1.2%     |
| Entropy                 | 0.673    | 0.686    | 0.711    | 0.725    | 0.677    | 0.677    | 0.639    | 0.641    | 0.637    |
|                         |          |          |          |          |          |          |          |          |          |
| <b>Women (n=212498)</b> |          |          |          |          |          |          |          |          |          |
| Number of parameters    | 65       | 98       | 131      | 164      | 197      | 230      | 263      | 296      | 329      |
| Degree of freedom       | 212433   | 212400   | 212367   | 212334   | 212301   | 212268   | 212235   | 212202   | 212169   |
| Maximal Log Likelihood  | -1123516 | -1114338 | -1105428 | -1100572 | -1096786 | -1095184 | -1093782 | -1092826 | -1091965 |
| AIC                     | 2247161  | 2228871  | 2211118  | 2201472  | 2193966  | 2190829  | 2188089  | 2186244  | 2184587  |
| BIC                     | 2247829  | 2229877  | 2212463  | 2203156  | 2195989  | 2193190  | 2190789  | 2189283  | 2187965  |
| Adjusted BIC            | 2247065  | 2228725  | 2210923  | 2201228  | 2193673  | 2190486  | 2187698  | 2185803  | 2184098  |
| Likelihood ratio        | 156969.8 | 138613.7 | 120794.8 | 111082.6 | 103510.6 | 100307   | 97501.5  | 95590.4  | 93867.8  |
| Smallest class          | 26.5%    | 4.4%     | 5.0%     | 3.8%     | 0.9%     | 0.9%     | 1.0%     | 0.9%     | 0.8%     |
| Entropy                 | 0.643    | 0.651    | 0.697    | 0.653    | 0.645    | 0.626    | 0.600    | 0.590    | 0.591    |

*AIC= Akaike Information Criterion; BIC= Bayesian Information Criterion*

**eTable 4.** Probabilistic Distribution of All Comorbidities of Interest Within Each Multimorbidity Cluster

| Comorbidities                                                | Men                         |                         |                 |                  |                             | Women                       |                         |                 |                  |
|--------------------------------------------------------------|-----------------------------|-------------------------|-----------------|------------------|-----------------------------|-----------------------------|-------------------------|-----------------|------------------|
|                                                              | Low multi-morbidity (60.5%) | Cardio-vascular (23.7%) | Diabetic (5.6%) | Malignant (5.1%) | Hepatic/Inflammatory (5.1%) | Low multi-morbidity (66.5%) | Cardio-vascular (23.5%) | Diabetic (5.0%) | Malignant (5.0%) |
| Myocardial infarct                                           | 3.7%                        | 26.9%                   | 27.0%           | 7.5%             | 11.7%                       | 1.6%                        | 16.4%                   | 20.3%           | 3.7%             |
| Congestive heart failure                                     | 2.0%                        | 38.2%                   | 35.4%           | 8.0%             | 17.5%                       | 1.6%                        | 28.9%                   | 29.6%           | 5.6%             |
| Peripheral vascular disease                                  | 3.6%                        | 19.9%                   | 33.8%           | 8.3%             | 12.3%                       | 2.4%                        | 13.5%                   | 21.4%           | 5.8%             |
| Cerebrovascular disease                                      | 12.1%                       | 40.9%                   | 39.4%           | 16.4%            | 25.6%                       | 8.9%                        | 35.4%                   | 33.9%           | 12.56%           |
| Cardiac valvular disease                                     | 0.3%                        | 8.4%                    | 5.7%            | 1.9%             | 3.6%                        | 0.2%                        | 8.1%                    | 5.5%            | 1.2%             |
| Cardiac arrhythmias                                          | 2.7%                        | 34.4%                   | 23.1%           | 9.1%             | 14.9%                       | 1.9%                        | 25.9%                   | 19.1%           | 5.9%             |
| Diabetes without chronic complications                       | 4.3%                        | 10.2%                   | 96.5%           | 9.9%             | 15.8%                       | 3.0%                        | 7.4%                    | 93.0%           | 8.0%             |
| Diabetes with chronic complications                          | 0.4%                        | 0.5%                    | 77.1%           | 0.4%             | 3.1%                        | 0.2%                        | 0.03%                   | 57.8%           | 0.2%             |
| Any malignancy, except malignant neoplasm of skin            | 12.2%                       | 20.0%                   | 21.3%           | 100.0%           | 21.7%                       | 10.6%                       | 16.0%                   | 20.5%           | 99.9%            |
| Metastatic solid tumour                                      | 0.4%                        | 0.9%                    | 3.0%            | 48.9%            | 3.5%                        | 0.3%                        | 0.8%                    | 2.3%            | 4.34%            |
| Rheumatic/ Rheumatoid arthritis or collagen vascular disease | 0.7%                        | 1.0%                    | 4.0%            | 0.9%             | 35.2%                       | 4.2%                        | 9.6%                    | 10.0%           | 6.4%             |
| Mild liver disease                                           | 0.8%                        | 0.7%                    | 4.6%            | 1.9%             | 33.3%                       | 0.7%                        | 3.2%                    | 5.1%            | 2.7%             |
| Moderate/severe liver disease                                | 0.1%                        | 0.1%                    | 1.7%            | 0.5%             | 17.7%                       | 0.1%                        | 1.2%                    | 1.8%            | 0.9%             |
| Hypertension                                                 | 4.2%                        | 35.4%                   | 46.7%           | 15.7%            | 19.5%                       | 4.8%                        | 37.2%                   | 46.6%           | 16.4%            |
| Chronic pulmonary disease                                    | 8.2%                        | 30.2%                   | 23.6%           | 17.0%            | 24.5%                       | 7.7%                        | 25.5%                   | 23.1%           | 18.6%            |
| Pulmonary circulation disease                                | 0.3%                        | 2.7%                    | 2.0%            | 1.5%             | 1.4%                        | 0.2%                        | 2.7%                    | 1.9%            | 1.2%             |
| Dementia                                                     | 6.1%                        | 17.5%                   | 11.3%           | 2.9%             | 9.4%                        | 6.0%                        | 19.3%                   | 12.0%           | 3.4%             |
| Psychoses                                                    | 0.3%                        | 0.7%                    | 0.5%            | 0.2%             | 7.7%                        | 0.2%                        | 0.8%                    | 0.6%            | 0.3%             |
| Depression                                                   | 0.5%                        | 5.9%                    | 4.2%            | 1.8%             | 5.5%                        | 0.5%                        | 8.8%                    | 4.4%            | 2.3%             |
| Neurological disorder                                        | 3.3%                        | 8.9%                    | 5.1%            | 2.7%             | 6.8%                        | 1.7%                        | 6.0%                    | 3.8%            | 2.5%             |

| Comorbidities               | Men                         |                         |                 |                  |                             | Women                       |                         |                 |                  |
|-----------------------------|-----------------------------|-------------------------|-----------------|------------------|-----------------------------|-----------------------------|-------------------------|-----------------|------------------|
|                             | Low multi-morbidity (60.5%) | Cardio-vascular (23.7%) | Diabetic (5.6%) | Malignant (5.1%) | Hepatic/Inflammatory (5.1%) | Low multi-morbidity (66.5%) | Cardio-vascular (23.5%) | Diabetic (5.0%) | Malignant (5.0%) |
| Hemi/paraplegia             | 0.6%                        | 1.4%                    | 1.8%            | 1.6%             | 1.4%                        | 0.3%                        | 0.8%                    | 0.8%            | 1.0%             |
| Peptic ulcer disease        | 3.8%                        | 14.5%                   | 13.7%           | 8.5%             | 20.9%                       | 3.2%                        | 14.3%                   | 12.1%           | 7.0%             |
| Chronic kidney disease      | 0.9%                        | 13.0%                   | 23.2%           | 5.1%             | 7.8%                        | 0.4%                        | 6.6%                    | 1.6%            | 3.2%             |
| Hypothyroidism              | 0.2%                        | 1.3%                    | 1.5%            | 0.6%             | 0.9%                        | 0.6%                        | 4.8%                    | 6.0%            | 2.2%             |
| Coagulopathy                | 0.1%                        | 1.0%                    | 1.0%            | 0.8%             | 2.2%                        | 0.1%                        | 0.8%                    | 0.9%            | 0.4%             |
| Obesity                     | 0.3%                        | 1.9%                    | 9.0%            | 1.0%             | 2.1%                        | 0.4%                        | 1.9%                    | 11.1%           | 1.9%             |
| Unintended weight loss      | 0.1%                        | 1.3%                    | 1.2%            | 1.0%             | 2.0%                        | 0.1%                        | 1.6%                    | 0.8%            | 0.7%             |
| Fluid/ electrolyte disorder | 1.1%                        | 12.2%                   | 9.5%            | 4.2%             | 9.0%                        | 1.0%                        | 15.2%                   | 9.5%            | 4.1%             |
| Anaemia                     | 0.3%                        | 3.8%                    | 3.2%            | 1.5%             | 4.4%                        | 0.3%                        | 4.4%                    | 3.2%            | 1.4%             |
| Alcohol abuse               | 0.4%                        | 0.5%                    | 2.1%            | 0.5%             | 23.6%                       | 0.1%                        | 1.4%                    | 1.3%            | 0.6%             |
| Drug abuse                  | 0.1%                        | 0.3%                    | 0.3%            | 0.1%             | 1.2%                        | 0.03%                       | 0.5%                    | 0.2%            | 0.1%             |
| HIV/AIDS                    | 0.04%                       | 0.1%                    | 0.1%            | 0.1%             | 0.2%                        | 0.0%                        | 0.0%                    | 0.01%           | 0.01%            |

*Data presented as probabilities (%) of each comorbidity of interest computed from the latent class analysis given the class membership.*

**eFigure 1.** Flowchart of Follow-up

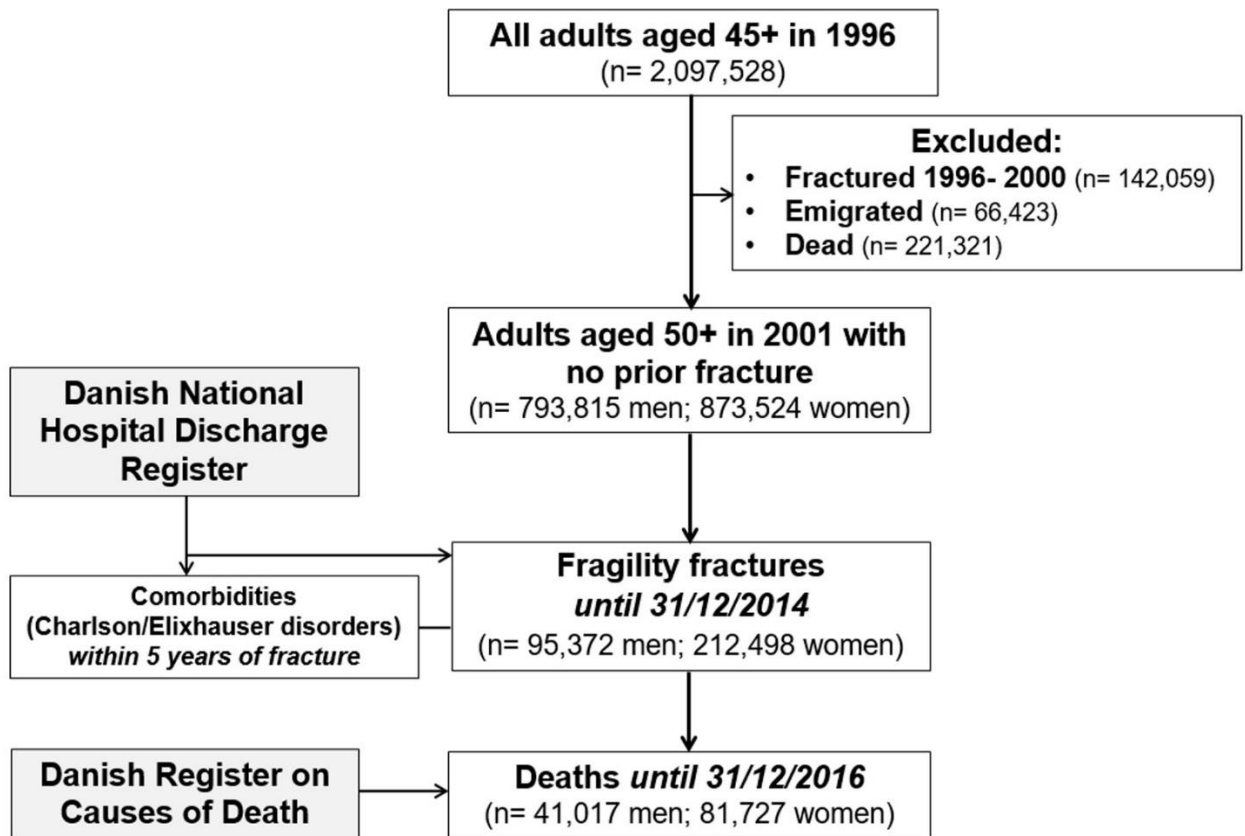

**eFigure 2.** The Model's Fit Indices of the Latent Class Models

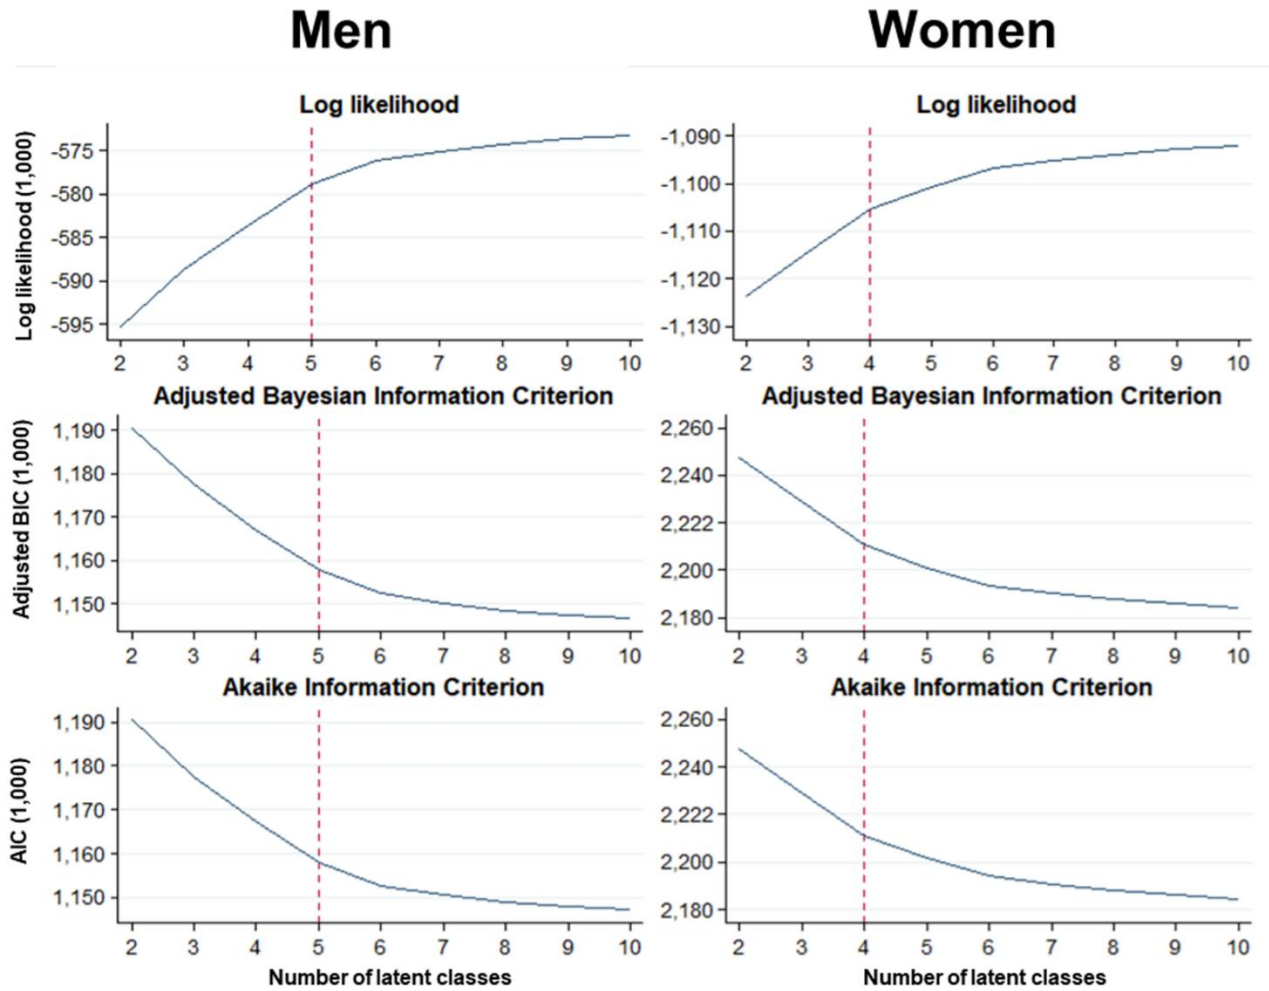

Supplement: jamanetwopen-e2235856-s001.pdf [file jamanetwopen-e2235856-s001.pdf]
